# Supplementary material for: The effect of dynamical fluctuations of hydration structures on the absorption spectra of oxyluciferin anions in an aqueous solution
Source: Royal Society of Chemistry journal article supplement (doi:10.1039/c7cp01067b), 2017-01-01
Supplement: c7cp01067b1.pdf [file c7cp01067b1.pdf]

ELECTRONIC SUPPLEMENTARY INFORMATION

## Effect of dynamical fluctuations of hydration structures on the absorption spectra of oxyluciferin anions in aqueous solution

M. Hiyama,<sup>a</sup> M. Shiga,<sup>b</sup> N. Koga,<sup>c</sup> O. Sugino,<sup>a</sup> H. Akiyama <sup>a</sup> and Y. Noguchi<sup>a</sup>

<sup>a</sup>Institute for Solid State Physics, The University of Tokyo, 5-1-5 Kashiwanoha, Kashiwa, Chiba 277-8581, Japan.

<sup>b</sup> Center for Computational Science and E-Systems, Japan Atomic Energy Agency 148-4 Kashiwanoha Campus, 178-4 Wakashiba, Kashiwa, Chiba, 277-0871, Japan

<sup>c</sup> Graduate School of Information Science, Nagoya University, Nagoya 464–8601, Japan.

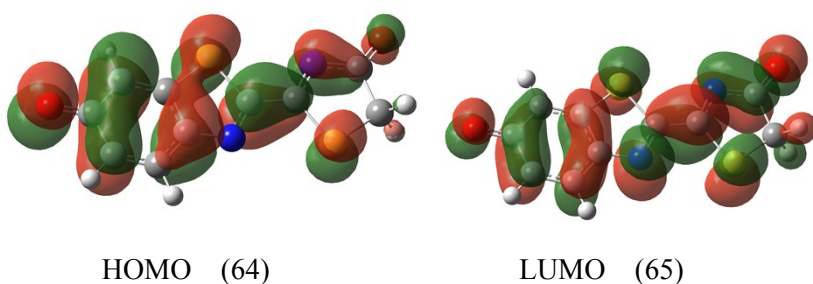

Fig.S1: molecular orbital for phenolate-keto

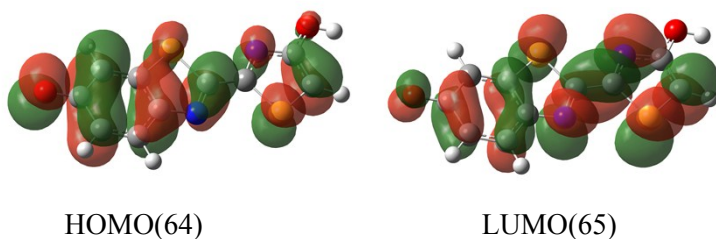

Fig. S2: molecular orbital for phenolate-enol

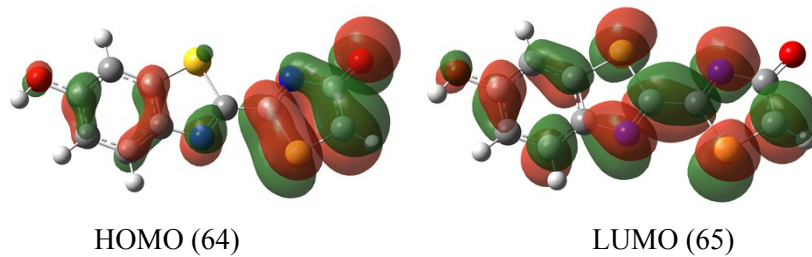

Fig.S3 molecular orbital for enolate

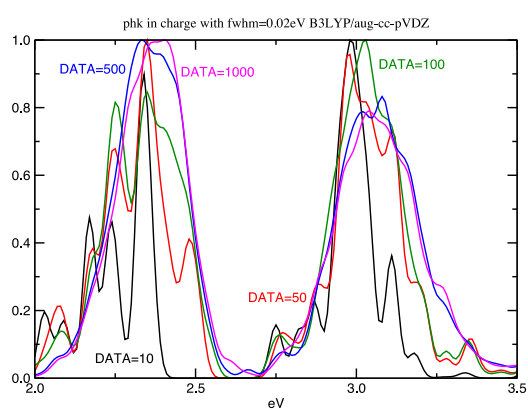

Fig.S4: tQM/MM absorption spectra for phenolate-keto with B3LYP/aug-cc-pVDZ and artificial line width 0.02 eV using 10, 50, 100, 500, and 1000 snapshot from FPMD calculations.

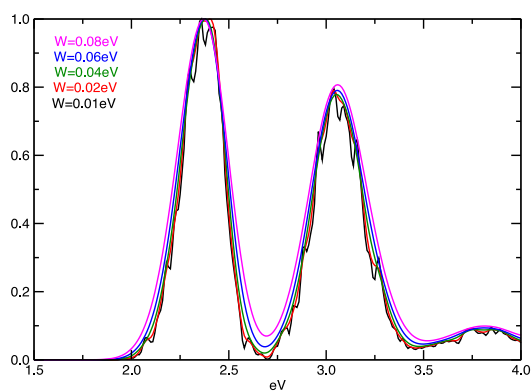

Fig.S5: tQM/MM absorption spectra for phenolate-keto with B3LYP/aug-cc-pVDZ and 1000 FPMD snapshots using the artificial line width: 0.01, 0.02, 0.04, 0.06, and 0.08 eV.

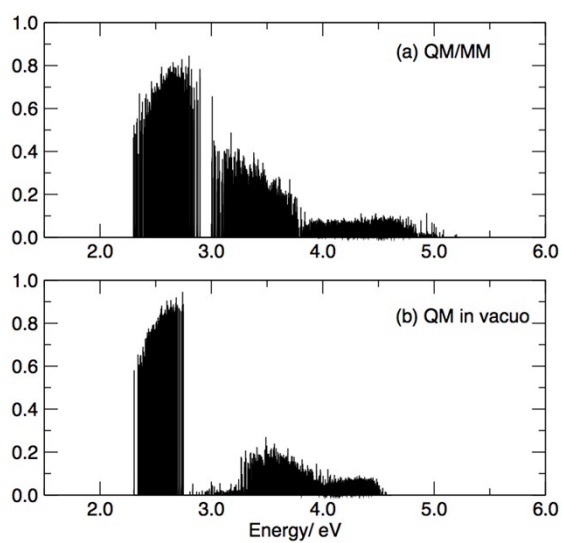

Fig.S6 : Excitation energies and oscillator strength between 1.0 and 5.0 eV using TDDFT cam-B3LYP/aug-cc-pVTZ for phenolate-keto. (a) QM/MM (b) QM in vacuo

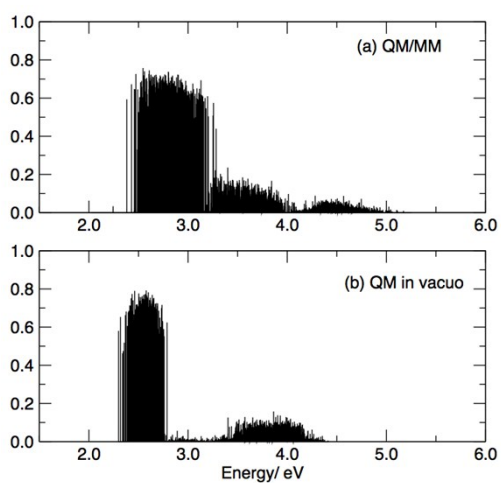

Fig.S7 : Excitation energies and oscillator strength between 1.0 and 5.0 eV using TDDFT cam-B3LYP/aug-cc-pVTZ for phenolate-enol. (a) QM/MM (b) QM in vacuo

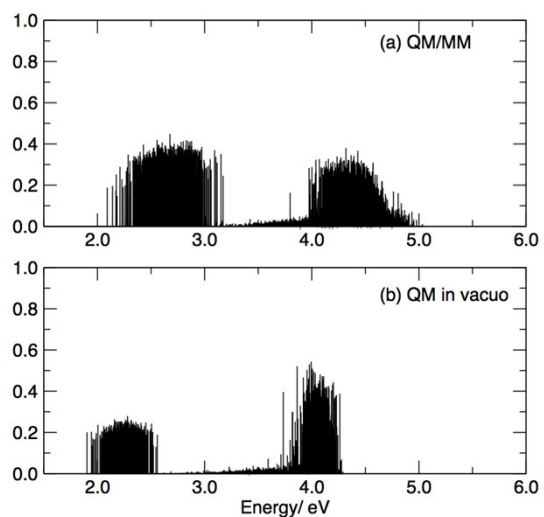

Fig.S8 : Excitation energies and oscillator strength between 1.0 and 5.0 eV using TDDFT cam-B3LYP/aug-cc-pVTZ for enolate. (a) QM/MM (b) QM in vacuo

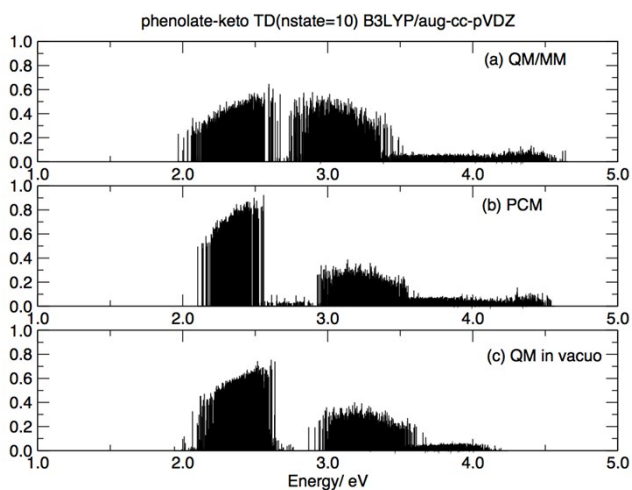

Fig.S9: Excitation energies and oscillator strength between 1.0 and 5.0 eV using TDDFT/B3LYP/aug-cc-pVDZ for phenolate-keto.

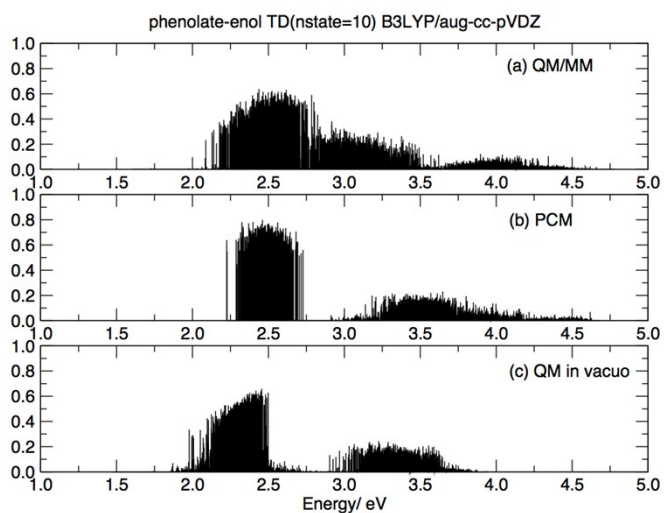

Fig.S10: Excitation energies and oscillator strength between 1.0 and 5.0 eV using TDDFT/B3LYP/aug-cc-pVDZ for phenolate-enol,

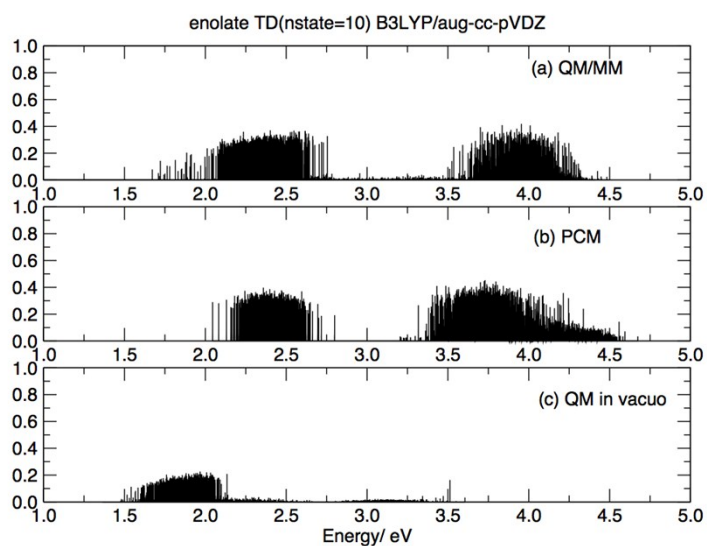

Fig.S11: Excitation energies and oscillator strength between 1.0 and 5.0 eV using TDDFT/B3LYP/aug-cc-pVDZ for enolate.
